# Supplementary material for: Highly efficient deep-blue organic electroluminescent devices doped with hexaphenylanthracene fluorophores
Source: Royal Society of Chemistry journal article supplement (doi:10.1039/c1jm10424a), 2011-01-01
Supplement: c1jm10424a.pdf [file c1jm10424a.pdf]

## *Supporting Information*

### **Highly Efficient Deep-Blue Organic Electroluminescent Devices Doped with Hexaphenylanthracene Fluorophores**

Sheng-Hsun Lin, Fang-Iy Wu,\* Hsiu-Yun Tsai, Pei-Yu Chou, Ho-Hsiu Chou,  
Chien-Hong Cheng,\* and Rai-Shung Liu\*

*Department of Chemistry, National Tsing Hua University, Hsinchu 30013, Taiwan,*

-----*e-mail: rslu@mx.nthu.edu.tw*

#### **Contents:**

|                                                                                                 |     |
|-------------------------------------------------------------------------------------------------|-----|
| A) X-ray data for <b>3bb</b> -----                                                              | S2  |
| B) NMR-Spectra for compounds <b>1bb</b> , <b>2bb</b> and <b>3bb</b> -----                       | S17 |
| C) DSC curve of <b>1bb</b> , <b>2bb</b> and <b>3bb</b> -----                                    | S23 |
| D) Absorption spectra of the <b>HPhAn</b> dopants in solution and the PL spectrum of DMPPP----- | S23 |

A. X-ray data for compound (3bb)

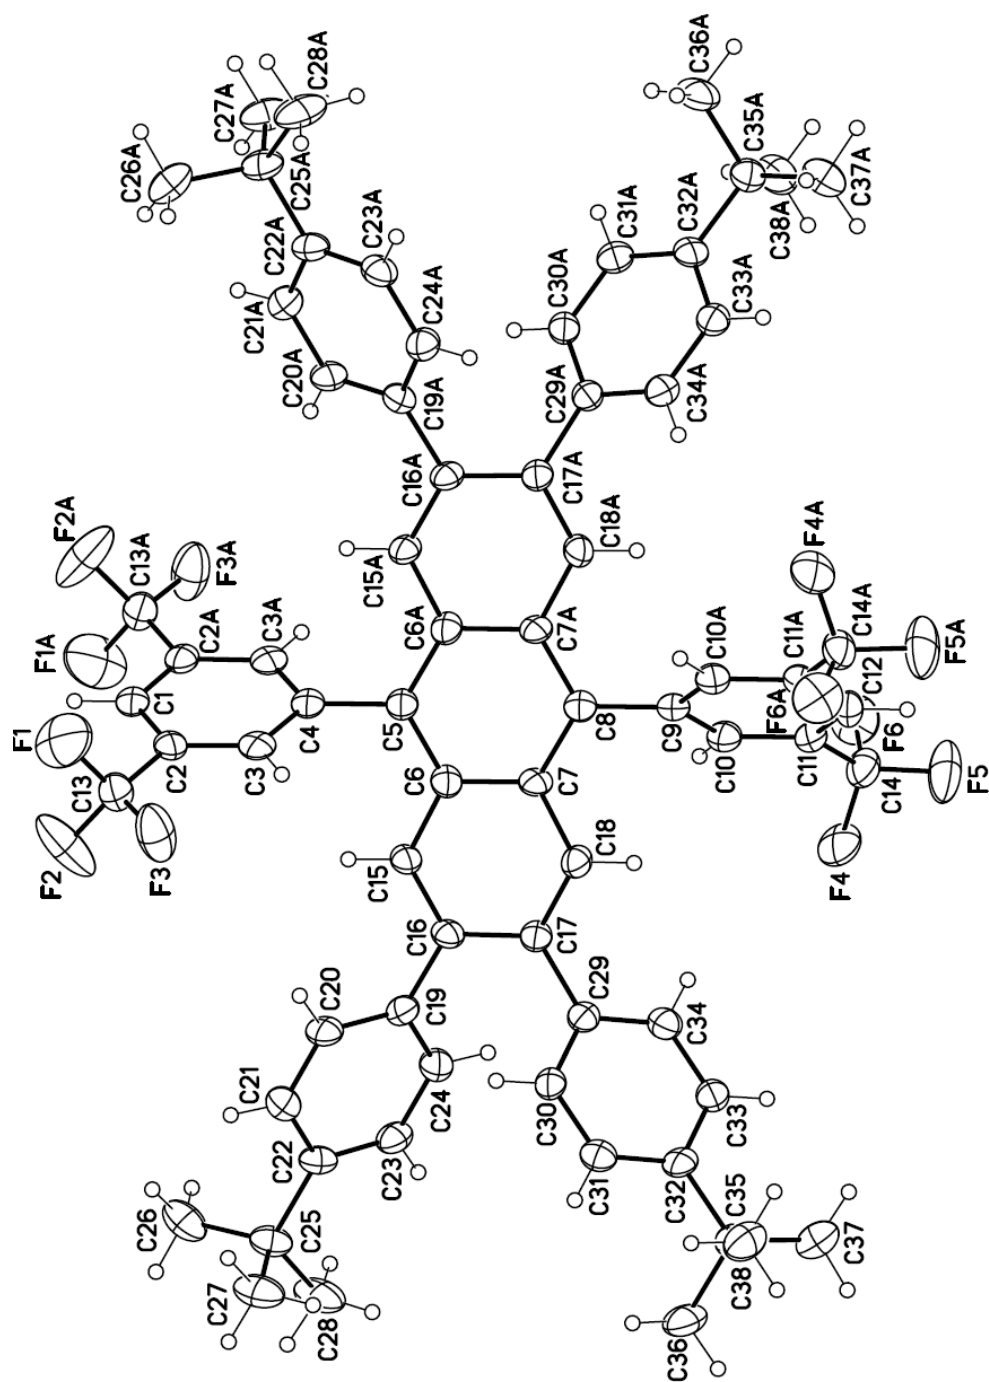

Table 1. Crystal data and structure refinement for **3bb**.

|                                   |                                                |                  |
|-----------------------------------|------------------------------------------------|------------------|
| Identification code               | 0908021t_0m                                    |                  |
| Empirical formula                 | C <sub>35</sub> H <sub>31</sub> F <sub>6</sub> |                  |
| Formula weight                    | 565.60                                         |                  |
| Temperature                       | 296(2) K                                       |                  |
| Wavelength                        | 0.71073 Å                                      |                  |
| Crystal system                    | Monoclinic                                     |                  |
| Space group                       | <i>C2/c</i>                                    |                  |
| Unit cell dimensions              | a = 19.118(3) Å                                | α = 90°.         |
|                                   | b = 27.955(5) Å                                | β = 123.128(6)°. |
|                                   | c = 13.258(2) Å                                | γ = 90°.         |
| Volume                            | 5934.1(18) Å <sup>3</sup>                      |                  |
| Z                                 | 8                                              |                  |
| Density (calculated)              | 1.266 Mg/m <sup>3</sup>                        |                  |
| Absorption coefficient            | 0.099 mm <sup>-1</sup>                         |                  |
| F(000)                            | 2360                                           |                  |
| Crystal size                      | 0.12 x 0.02 x 0.02 mm <sup>3</sup>             |                  |
| Theta range for data collection   | 1.46 to 26.43°.                                |                  |
| Index ranges                      | -22 ≤ h ≤ 23, -34 ≤ k ≤ 34, -16 ≤ l ≤ 14       |                  |
| Reflections collected             | 44436                                          |                  |
| Independent reflections           | 6082 [R(int) = 0.2174]                         |                  |
| Completeness to theta = 26.43°    | 99.4 %                                         |                  |
| Absorption correction             | Empirical                                      |                  |
| Max. and min. transmission        | 0.7454 and 0.5824                              |                  |
| Refinement method                 | Full-matrix least-squares on F <sup>2</sup>    |                  |
| Data / restraints / parameters    | 6082 / 0 / 376                                 |                  |
| Goodness-of-fit on F <sup>2</sup> | 0.963                                          |                  |
| Final R indices [I > 2σ(I)]       | R1 = 0.0768, wR2 = 0.1674                      |                  |
| R indices (all data)              | R1 = 0.2254, wR2 = 0.2436                      |                  |
| Extinction coefficient            | 0.0048(5)                                      |                  |
| Largest diff. peak and hole       | 0.635 and -0.495 e.Å <sup>-3</sup>             |                  |

Table 2. Atomic coordinates ( $\times 10^4$ ) and equivalent isotropic displacement parameters ( $\text{\AA}^2 \times 10^3$ ) for **3bb**.  $U(\text{eq})$  is defined as one third of the trace of the orthogonalized  $U^{\text{ij}}$  tensor.

|       | x       | y        | z       | U(eq) |
|-------|---------|----------|---------|-------|
| C(1)  | 5000    | -1899(2) | 7500    | 27(1) |
| C(2)  | 5200(3) | -1649(2) | 6792(4) | 29(1) |
| C(3)  | 5208(3) | -1153(2) | 6802(4) | 29(1) |
| C(4)  | 5000    | -896(2)  | 7500    | 27(1) |
| C(5)  | 5000    | -357(2)  | 7500    | 26(2) |
| C(6)  | 4461(3) | -103(2)  | 6418(4) | 27(1) |
| C(7)  | 4473(3) | 408(2)   | 6418(4) | 25(1) |
| C(8)  | 5000    | 662(2)   | 7500    | 25(2) |
| C(9)  | 5000    | 1195(2)  | 7500    | 29(2) |
| C(10) | 4285(3) | 1453(2)  | 7187(4) | 32(1) |
| C(11) | 4280(3) | 1948(2)  | 7192(4) | 31(1) |
| C(12) | 5000    | 2199(2)  | 7500    | 35(2) |
| C(13) | 5406(3) | -1924(2) | 6028(5) | 40(1) |
| C(14) | 3510(3) | 2212(2)  | 6866(5) | 41(1) |
| C(15) | 3857(3) | -338(2)  | 5319(4) | 27(1) |
| C(16) | 3331(3) | -98(2)   | 4274(4) | 26(1) |
| C(17) | 3409(3) | 413(2)   | 4237(4) | 26(1) |
| C(18) | 3962(3) | 647(2)   | 5292(4) | 29(1) |
| C(19) | 2668(3) | -364(2)  | 3207(4) | 29(1) |
| C(20) | 2843(3) | -789(2)  | 2842(4) | 32(1) |
| C(21) | 2230(3) | -1031(2) | 1830(4) | 34(1) |
| C(22) | 1416(3) | -858(2)  | 1116(4) | 30(1) |
| C(23) | 1238(3) | -445(2)  | 1506(4) | 32(1) |
| C(24) | 1850(3) | -199(2)  | 2521(4) | 32(1) |
| C(25) | 775(3)  | -1132(2) | -26(4)  | 37(1) |
| C(26) | 668(4)  | -1642(2) | 297(5)  | 51(2) |
| C(27) | 1095(3) | -1156(2) | -859(4) | 49(2) |
| C(28) | -80(3)  | -884(2)  | -697(5) | 52(2) |
| C(29) | 2944(3) | 693(2)   | 3083(4) | 27(1) |
| C(30) | 2894(3) | 531(2)   | 2055(4) | 27(1) |
| C(31) | 2525(3) | 814(2)   | 1023(4) | 30(1) |

|       |         |          |          |       |
|-------|---------|----------|----------|-------|
| C(32) | 2214(3) | 1264(2)  | 988(4)   | 30(1) |
| C(33) | 2257(3) | 1420(2)  | 2018(4)  | 30(1) |
| C(34) | 2619(3) | 1137(2)  | 3052(4)  | 31(1) |
| C(35) | 1864(3) | 1577(2)  | -145(4)  | 33(1) |
| C(36) | 1192(3) | 1297(2)  | -1260(4) | 43(1) |
| C(37) | 1493(3) | 2037(2)  | -50(5)   | 46(2) |
| C(38) | 2593(3) | 1695(2)  | -291(5)  | 46(2) |
| F(1)  | 6083(3) | -2203(1) | 6685(3)  | 90(1) |
| F(2)  | 4816(2) | -2226(1) | 5303(3)  | 82(1) |
| F(3)  | 5583(2) | -1667(1) | 5371(3)  | 63(1) |
| F(4)  | 2851(2) | 2068(1)  | 5798(3)  | 55(1) |
| F(5)  | 3571(2) | 2683(1)  | 6808(3)  | 67(1) |
| F(6)  | 3288(2) | 2126(1)  | 7655(3)  | 58(1) |

---

Table 3. Bond lengths [Å] and angles [°] for **3bb**.

---

|               |          |
|---------------|----------|
| C(1)-C(2)     | 1.380(6) |
| C(1)-C(2)#1   | 1.380(6) |
| C(1)-H(1)     | 0.9300   |
| C(2)-C(3)     | 1.388(6) |
| C(2)-C(13)    | 1.487(7) |
| C(3)-C(4)     | 1.390(6) |
| C(3)-H(3)     | 0.9300   |
| C(4)-C(3)#1   | 1.390(6) |
| C(4)-C(5)     | 1.507(8) |
| C(5)-C(6)     | 1.417(5) |
| C(5)-C(6)#1   | 1.417(5) |
| C(6)-C(7)     | 1.428(6) |
| C(6)-C(15)    | 1.430(6) |
| C(7)-C(8)     | 1.414(5) |
| C(7)-C(18)    | 1.427(6) |
| C(8)-C(7)#1   | 1.414(5) |
| C(8)-C(9)     | 1.489(9) |
| C(9)-C(10)#1  | 1.393(6) |
| C(9)-C(10)    | 1.393(6) |
| C(10)-C(11)   | 1.384(6) |
| C(10)-H(10)   | 0.9300   |
| C(11)-C(12)   | 1.393(6) |
| C(11)-C(14)   | 1.484(7) |
| C(12)-C(11)#1 | 1.393(6) |
| C(12)-H(12)   | 0.9300   |
| C(13)-F(3)    | 1.309(6) |
| C(13)-F(2)    | 1.313(6) |
| C(13)-F(1)    | 1.343(6) |
| C(14)-F(5)    | 1.329(5) |
| C(14)-F(4)    | 1.343(5) |
| C(14)-F(6)    | 1.347(6) |
| C(15)-C(16)   | 1.363(6) |
| C(15)-H(15)   | 0.9300   |
| C(16)-C(17)   | 1.441(6) |

|              |          |
|--------------|----------|
| C(16)-C(19)  | 1.483(6) |
| C(17)-C(18)  | 1.372(6) |
| C(17)-C(29)  | 1.502(6) |
| C(18)-H(18)  | 0.9300   |
| C(19)-C(24)  | 1.390(6) |
| C(19)-C(20)  | 1.390(6) |
| C(20)-C(21)  | 1.383(6) |
| C(20)-H(20)  | 0.9300   |
| C(21)-C(22)  | 1.392(6) |
| C(21)-H(21)  | 0.9300   |
| C(22)-C(23)  | 1.383(6) |
| C(22)-C(25)  | 1.533(6) |
| C(23)-C(24)  | 1.389(6) |
| C(23)-H(23)  | 0.9300   |
| C(24)-H(24)  | 0.9300   |
| C(25)-C(27)  | 1.528(7) |
| C(25)-C(28)  | 1.533(7) |
| C(25)-C(26)  | 1.534(7) |
| C(26)-H(26A) | 0.9600   |
| C(26)-H(26B) | 0.9600   |
| C(26)-H(26C) | 0.9600   |
| C(27)-H(27A) | 0.9600   |
| C(27)-H(27B) | 0.9600   |
| C(27)-H(27C) | 0.9600   |
| C(28)-H(28A) | 0.9600   |
| C(28)-H(28B) | 0.9600   |
| C(28)-H(28C) | 0.9600   |
| C(29)-C(34)  | 1.381(6) |
| C(29)-C(30)  | 1.389(6) |
| C(30)-C(31)  | 1.394(6) |
| C(30)-H(30)  | 0.9300   |
| C(31)-C(32)  | 1.380(6) |
| C(31)-H(31)  | 0.9300   |
| C(32)-C(33)  | 1.394(6) |
| C(32)-C(35)  | 1.540(6) |
| C(33)-C(34)  | 1.396(6) |

|                  |          |
|------------------|----------|
| C(33)-H(33)      | 0.9300   |
| C(34)-H(34)      | 0.9300   |
| C(35)-C(37)      | 1.507(7) |
| C(35)-C(36)      | 1.540(7) |
| C(35)-C(38)      | 1.545(7) |
| C(36)-H(36A)     | 0.9600   |
| C(36)-H(36B)     | 0.9600   |
| C(36)-H(36C)     | 0.9600   |
| C(37)-H(37A)     | 0.9600   |
| C(37)-H(37B)     | 0.9600   |
| C(37)-H(37C)     | 0.9600   |
| C(38)-H(38A)     | 0.9600   |
| C(38)-H(38B)     | 0.9600   |
| C(38)-H(38C)     | 0.9600   |
|                  |          |
| C(2)-C(1)-C(2)#1 | 119.3(6) |
| C(2)-C(1)-H(1)   | 120.3    |
| C(2)#1-C(1)-H(1) | 120.3    |
| C(1)-C(2)-C(3)   | 120.3(5) |
| C(1)-C(2)-C(13)  | 118.5(4) |
| C(3)-C(2)-C(13)  | 121.2(4) |
| C(2)-C(3)-C(4)   | 121.2(5) |
| C(2)-C(3)-H(3)   | 119.4    |
| C(4)-C(3)-H(3)   | 119.4    |
| C(3)#1-C(4)-C(3) | 117.7(6) |
| C(3)#1-C(4)-C(5) | 121.1(3) |
| C(3)-C(4)-C(5)   | 121.1(3) |
| C(6)-C(5)-C(6)#1 | 119.9(6) |
| C(6)-C(5)-C(4)   | 120.0(3) |
| C(6)#1-C(5)-C(4) | 120.0(3) |
| C(5)-C(6)-C(7)   | 119.8(4) |
| C(5)-C(6)-C(15)  | 122.5(4) |
| C(7)-C(6)-C(15)  | 117.5(4) |
| C(8)-C(7)-C(18)  | 121.8(4) |
| C(8)-C(7)-C(6)   | 120.4(4) |
| C(18)-C(7)-C(6)  | 117.8(4) |



|                     |          |
|---------------------|----------|
| C(7)#1-C(8)-C(7)    | 119.5(6) |
| C(7)#1-C(8)-C(9)    | 120.2(3) |
| C(7)-C(8)-C(9)      | 120.2(3) |
| C(10)#1-C(9)-C(10)  | 117.7(6) |
| C(10)#1-C(9)-C(8)   | 121.2(3) |
| C(10)-C(9)-C(8)     | 121.2(3) |
| C(11)-C(10)-C(9)    | 121.6(5) |
| C(11)-C(10)-H(10)   | 119.2    |
| C(9)-C(10)-H(10)    | 119.2    |
| C(10)-C(11)-C(12)   | 119.9(5) |
| C(10)-C(11)-C(14)   | 120.2(4) |
| C(12)-C(11)-C(14)   | 119.9(4) |
| C(11)#1-C(12)-C(11) | 119.4(6) |
| C(11)#1-C(12)-H(12) | 120.3    |
| C(11)-C(12)-H(12)   | 120.3    |
| F(3)-C(13)-F(2)     | 107.4(4) |
| F(3)-C(13)-F(1)     | 104.1(5) |
| F(2)-C(13)-F(1)     | 103.9(5) |
| F(3)-C(13)-C(2)     | 115.5(4) |
| F(2)-C(13)-C(2)     | 112.9(5) |
| F(1)-C(13)-C(2)     | 112.1(4) |
| F(5)-C(14)-F(4)     | 107.3(4) |
| F(5)-C(14)-F(6)     | 107.2(4) |
| F(4)-C(14)-F(6)     | 104.7(4) |
| F(5)-C(14)-C(11)    | 113.9(4) |
| F(4)-C(14)-C(11)    | 111.6(4) |
| F(6)-C(14)-C(11)    | 111.6(4) |
| C(16)-C(15)-C(6)    | 123.2(4) |
| C(16)-C(15)-H(15)   | 118.4    |
| C(6)-C(15)-H(15)    | 118.4    |
| C(15)-C(16)-C(17)   | 119.3(4) |
| C(15)-C(16)-C(19)   | 119.7(4) |
| C(17)-C(16)-C(19)   | 121.0(4) |
| C(18)-C(17)-C(16)   | 118.3(4) |
| C(18)-C(17)-C(29)   | 119.3(4) |
| C(16)-C(17)-C(29)   | 122.4(4) |

|                     |          |
|---------------------|----------|
| C(17)-C(18)-C(7)    | 123.3(4) |
| C(17)-C(18)-H(18)   | 118.3    |
| C(7)-C(18)-H(18)    | 118.3    |
| C(24)-C(19)-C(20)   | 117.0(4) |
| C(24)-C(19)-C(16)   | 121.8(4) |
| C(20)-C(19)-C(16)   | 121.2(4) |
| C(21)-C(20)-C(19)   | 121.2(5) |
| C(21)-C(20)-H(20)   | 119.4    |
| C(19)-C(20)-H(20)   | 119.4    |
| C(20)-C(21)-C(22)   | 122.0(5) |
| C(20)-C(21)-H(21)   | 119.0    |
| C(22)-C(21)-H(21)   | 119.0    |
| C(23)-C(22)-C(21)   | 116.5(4) |
| C(23)-C(22)-C(25)   | 123.9(4) |
| C(21)-C(22)-C(25)   | 119.5(4) |
| C(22)-C(23)-C(24)   | 121.8(5) |
| C(22)-C(23)-H(23)   | 119.1    |
| C(24)-C(23)-H(23)   | 119.1    |
| C(23)-C(24)-C(19)   | 121.4(5) |
| C(23)-C(24)-H(24)   | 119.3    |
| C(19)-C(24)-H(24)   | 119.3    |
| C(27)-C(25)-C(22)   | 108.4(4) |
| C(27)-C(25)-C(28)   | 108.7(4) |
| C(22)-C(25)-C(28)   | 111.8(4) |
| C(27)-C(25)-C(26)   | 109.1(4) |
| C(22)-C(25)-C(26)   | 110.1(4) |
| C(28)-C(25)-C(26)   | 108.6(5) |
| C(25)-C(26)-H(26A)  | 109.5    |
| C(25)-C(26)-H(26B)  | 109.5    |
| H(26A)-C(26)-H(26B) | 109.5    |
| C(25)-C(26)-H(26C)  | 109.5    |
| H(26A)-C(26)-H(26C) | 109.5    |
| H(26B)-C(26)-H(26C) | 109.5    |
| C(25)-C(27)-H(27A)  | 109.5    |
| C(25)-C(27)-H(27B)  | 109.5    |
| H(27A)-C(27)-H(27B) | 109.5    |

|                     |          |
|---------------------|----------|
| C(25)-C(27)-H(27C)  | 109.5    |
| H(27A)-C(27)-H(27C) | 109.5    |
| H(27B)-C(27)-H(27C) | 109.5    |
| C(25)-C(28)-H(28A)  | 109.5    |
| C(25)-C(28)-H(28B)  | 109.5    |
| H(28A)-C(28)-H(28B) | 109.5    |
| C(25)-C(28)-H(28C)  | 109.5    |
| H(28A)-C(28)-H(28C) | 109.5    |
| H(28B)-C(28)-H(28C) | 109.5    |
| C(34)-C(29)-C(30)   | 118.4(4) |
| C(34)-C(29)-C(17)   | 120.3(4) |
| C(30)-C(29)-C(17)   | 121.1(4) |
| C(29)-C(30)-C(31)   | 120.3(4) |
| C(29)-C(30)-H(30)   | 119.9    |
| C(31)-C(30)-H(30)   | 119.9    |
| C(32)-C(31)-C(30)   | 121.9(4) |
| C(32)-C(31)-H(31)   | 119.0    |
| C(30)-C(31)-H(31)   | 119.0    |
| C(31)-C(32)-C(33)   | 117.4(4) |
| C(31)-C(32)-C(35)   | 120.0(4) |
| C(33)-C(32)-C(35)   | 122.6(4) |
| C(32)-C(33)-C(34)   | 121.1(5) |
| C(32)-C(33)-H(33)   | 119.5    |
| C(34)-C(33)-H(33)   | 119.5    |
| C(29)-C(34)-C(33)   | 120.9(5) |
| C(29)-C(34)-H(34)   | 119.6    |
| C(33)-C(34)-H(34)   | 119.6    |
| C(37)-C(35)-C(36)   | 109.3(4) |
| C(37)-C(35)-C(32)   | 112.2(4) |
| C(36)-C(35)-C(32)   | 109.8(4) |
| C(37)-C(35)-C(38)   | 109.0(4) |
| C(36)-C(35)-C(38)   | 108.9(4) |
| C(32)-C(35)-C(38)   | 107.6(4) |
| C(35)-C(36)-H(36A)  | 109.5    |
| C(35)-C(36)-H(36B)  | 109.5    |
| H(36A)-C(36)-H(36B) | 109.5    |

|                     |       |
|---------------------|-------|
| C(35)-C(36)-H(36C)  | 109.5 |
| H(36A)-C(36)-H(36C) | 109.5 |
| H(36B)-C(36)-H(36C) | 109.5 |
| C(35)-C(37)-H(37A)  | 109.5 |
| C(35)-C(37)-H(37B)  | 109.5 |
| H(37A)-C(37)-H(37B) | 109.5 |
| C(35)-C(37)-H(37C)  | 109.5 |
| H(37A)-C(37)-H(37C) | 109.5 |
| H(37B)-C(37)-H(37C) | 109.5 |
| C(35)-C(38)-H(38A)  | 109.5 |
| C(35)-C(38)-H(38B)  | 109.5 |
| H(38A)-C(38)-H(38B) | 109.5 |
| C(35)-C(38)-H(38C)  | 109.5 |
| H(38A)-C(38)-H(38C) | 109.5 |
| H(38B)-C(38)-H(38C) | 109.5 |

---

Symmetry transformations used to generate equivalent atoms:

#1  $-x+1, y, -z+3/2$

Table 4. Anisotropic displacement parameters ( $\text{\AA}^2 \times 10^3$ ) for **3bb**. The anisotropic displacement factor exponent takes the form:  $-2\pi^2 [ h^2 a^{*2} U^{11} + \dots + 2 h k a^* b^* U^{12} ]$

|       | U <sup>11</sup> | U <sup>22</sup> | U <sup>33</sup> | U <sup>23</sup> | U <sup>13</sup> | U <sup>12</sup> |
|-------|-----------------|-----------------|-----------------|-----------------|-----------------|-----------------|
| C(1)  | 12(2)           | 29(3)           | 26(3)           | 0               | 2(2)            | 0               |
| C(2)  | 20(3)           | 30(3)           | 24(3)           | -3(2)           | 5(2)            | 1(2)            |
| C(3)  | 12(2)           | 37(3)           | 24(3)           | 0(2)            | 1(2)            | -2(2)           |
| C(4)  | 12(2)           | 29(3)           | 26(3)           | 0               | 2(2)            | 0               |
| C(5)  | 21(4)           | 26(4)           | 27(4)           | 0               | 10(3)           | 0               |
| C(6)  | 19(3)           | 25(3)           | 30(3)           | -2(2)           | 10(2)           | -1(2)           |
| C(7)  | 16(2)           | 30(3)           | 22(3)           | 0(2)            | 5(2)            | -5(2)           |
| C(8)  | 19(4)           | 28(4)           | 27(4)           | 0               | 12(3)           | 0               |
| C(9)  | 30(4)           | 28(4)           | 20(3)           | 0               | 8(3)            | 0               |
| C(10) | 26(3)           | 32(3)           | 27(3)           | 1(2)            | 8(2)            | -2(2)           |
| C(11) | 29(3)           | 27(3)           | 26(3)           | 2(2)            | 7(2)            | 2(2)            |
| C(12) | 37(5)           | 20(4)           | 37(4)           | 0               | 14(4)           | 0               |
| C(13) | 40(3)           | 31(3)           | 40(3)           | -2(3)           | 17(3)           | -1(3)           |
| C(14) | 30(3)           | 29(3)           | 45(4)           | 4(3)            | 8(3)            | 0(2)            |
| C(15) | 20(3)           | 27(3)           | 25(3)           | -3(2)           | 6(2)            | 2(2)            |
| C(16) | 19(3)           | 30(3)           | 23(3)           | -3(2)           | 7(2)            | 0(2)            |
| C(17) | 18(3)           | 26(3)           | 27(3)           | 0(2)            | 8(2)            | -1(2)           |
| C(18) | 25(3)           | 24(3)           | 30(3)           | 3(2)            | 10(2)           | -2(2)           |
| C(19) | 27(3)           | 29(3)           | 25(3)           | 4(2)            | 9(2)            | 3(2)            |
| C(20) | 21(3)           | 37(3)           | 25(3)           | 0(2)            | 3(2)            | -3(2)           |
| C(21) | 33(3)           | 32(3)           | 32(3)           | -4(2)           | 14(3)           | -4(2)           |
| C(22) | 23(3)           | 39(3)           | 21(3)           | -1(2)           | 8(2)            | -3(2)           |
| C(23) | 24(3)           | 35(3)           | 28(3)           | 6(2)            | 9(2)            | 3(2)            |
| C(24) | 27(3)           | 30(3)           | 31(3)           | -2(2)           | 11(2)           | 0(2)            |
| C(25) | 23(3)           | 47(3)           | 27(3)           | -5(2)           | 5(2)            | -6(2)           |
| C(26) | 44(4)           | 50(4)           | 46(3)           | -19(3)          | 17(3)           | -18(3)          |
| C(27) | 30(3)           | 71(4)           | 31(3)           | -10(3)          | 7(3)            | -4(3)           |
| C(28) | 26(3)           | 72(4)           | 36(3)           | -16(3)          | 4(3)            | -5(3)           |
| C(29) | 20(3)           | 27(3)           | 26(3)           | 1(2)            | 8(2)            | -5(2)           |
| C(30) | 20(3)           | 25(3)           | 29(3)           | 1(2)            | 9(2)            | 1(2)            |
| C(31) | 21(3)           | 36(3)           | 28(3)           | -3(2)           | 11(2)           | -3(2)           |

|       |        |       |        |        |       |        |
|-------|--------|-------|--------|--------|-------|--------|
| C(32) | 16(3)  | 33(3) | 26(3)  | 3(2)   | 3(2)  | -1(2)  |
| C(33) | 25(3)  | 29(3) | 29(3)  | -1(2)  | 11(2) | 2(2)   |
| C(34) | 31(3)  | 32(3) | 27(3)  | -3(2)  | 13(2) | -4(2)  |
| C(35) | 28(3)  | 32(3) | 31(3)  | 3(2)   | 11(2) | 2(2)   |
| C(36) | 31(3)  | 52(4) | 30(3)  | 9(3)   | 6(3)  | 4(3)   |
| C(37) | 41(3)  | 49(4) | 39(3)  | 13(3)  | 17(3) | 11(3)  |
| C(38) | 44(4)  | 47(3) | 42(3)  | 11(3)  | 21(3) | 1(3)   |
| F(1)  | 102(3) | 94(3) | 76(3)  | 10(2)  | 50(2) | 56(3)  |
| F(2)  | 92(3)  | 91(3) | 97(3)  | -65(2) | 73(3) | -60(2) |
| F(3)  | 101(3) | 41(2) | 84(3)  | -12(2) | 74(2) | -17(2) |
| F(4)  | 31(2)  | 50(2) | 55(2)  | 9(2)   | 4(2)  | 10(2)  |
| F(5)  | 47(2)  | 29(2) | 112(3) | 3(2)   | 35(2) | 8(2)   |
| F(6)  | 46(2)  | 65(2) | 68(2)  | -2(2)  | 36(2) | 8(2)   |

---

Table 5. Hydrogen coordinates ( $\times 10^4$ ) and isotropic displacement parameters ( $\text{\AA}^2 \times 10^{-3}$ ) for **3bb**.

|        | x    | y     | z     | U(eq) |
|--------|------|-------|-------|-------|
| H(1)   | 5000 | -2231 | 7500  | 32    |
| H(3)   | 5355 | -989  | 6334  | 34    |
| H(10)  | 3799 | 1288  | 6970  | 38    |
| H(12)  | 5000 | 2532  | 7500  | 41    |
| H(15)  | 3821 | -669  | 5319  | 33    |
| H(18)  | 4006 | 977   | 5272  | 35    |
| H(20)  | 3382 | -912  | 3286  | 39    |
| H(21)  | 2365 | -1317 | 1621  | 41    |
| H(23)  | 694  | -328  | 1076  | 38    |
| H(24)  | 1709 | 81    | 2747  | 38    |
| H(26A) | 1193 | -1807 | 677   | 76    |
| H(26B) | 262  | -1809 | -422  | 76    |
| H(26C) | 483  | -1629 | 839   | 76    |
| H(27A) | 1153 | -837  | -1076 | 74    |
| H(27B) | 705  | -1331 | -1573 | 74    |
| H(27C) | 1627 | -1313 | -451  | 74    |
| H(28A) | -275 | -853  | -169  | 77    |
| H(28B) | -470 | -1071 | -1387 | 77    |
| H(28C) | -29  | -572  | -955  | 77    |
| H(30)  | 3108 | 232   | 2055  | 32    |
| H(31)  | 2487 | 697   | 338   | 36    |
| H(33)  | 2040 | 1719  | 2016  | 35    |
| H(34)  | 2641 | 1250  | 3730  | 37    |
| H(36A) | 751  | 1207  | -1157 | 65    |
| H(36B) | 1437 | 1015  | -1356 | 65    |
| H(36C) | 971  | 1495  | -1962 | 65    |
| H(37A) | 1055 | 1966  | 77    | 68    |
| H(37B) | 1268 | 2217  | -782  | 68    |
| H(37C) | 1919 | 2222  | 615   | 68    |
| H(38A) | 2391 | 1888  | -998  | 68    |

|        |      |      |      |    |
|--------|------|------|------|----|
| H(38B) | 2825 | 1404 | -370 | 68 |
| H(38C) | 3017 | 1868 | 403  | 68 |

---



**B. NMR spectral- data for key compounds:**

Compound **1bb**

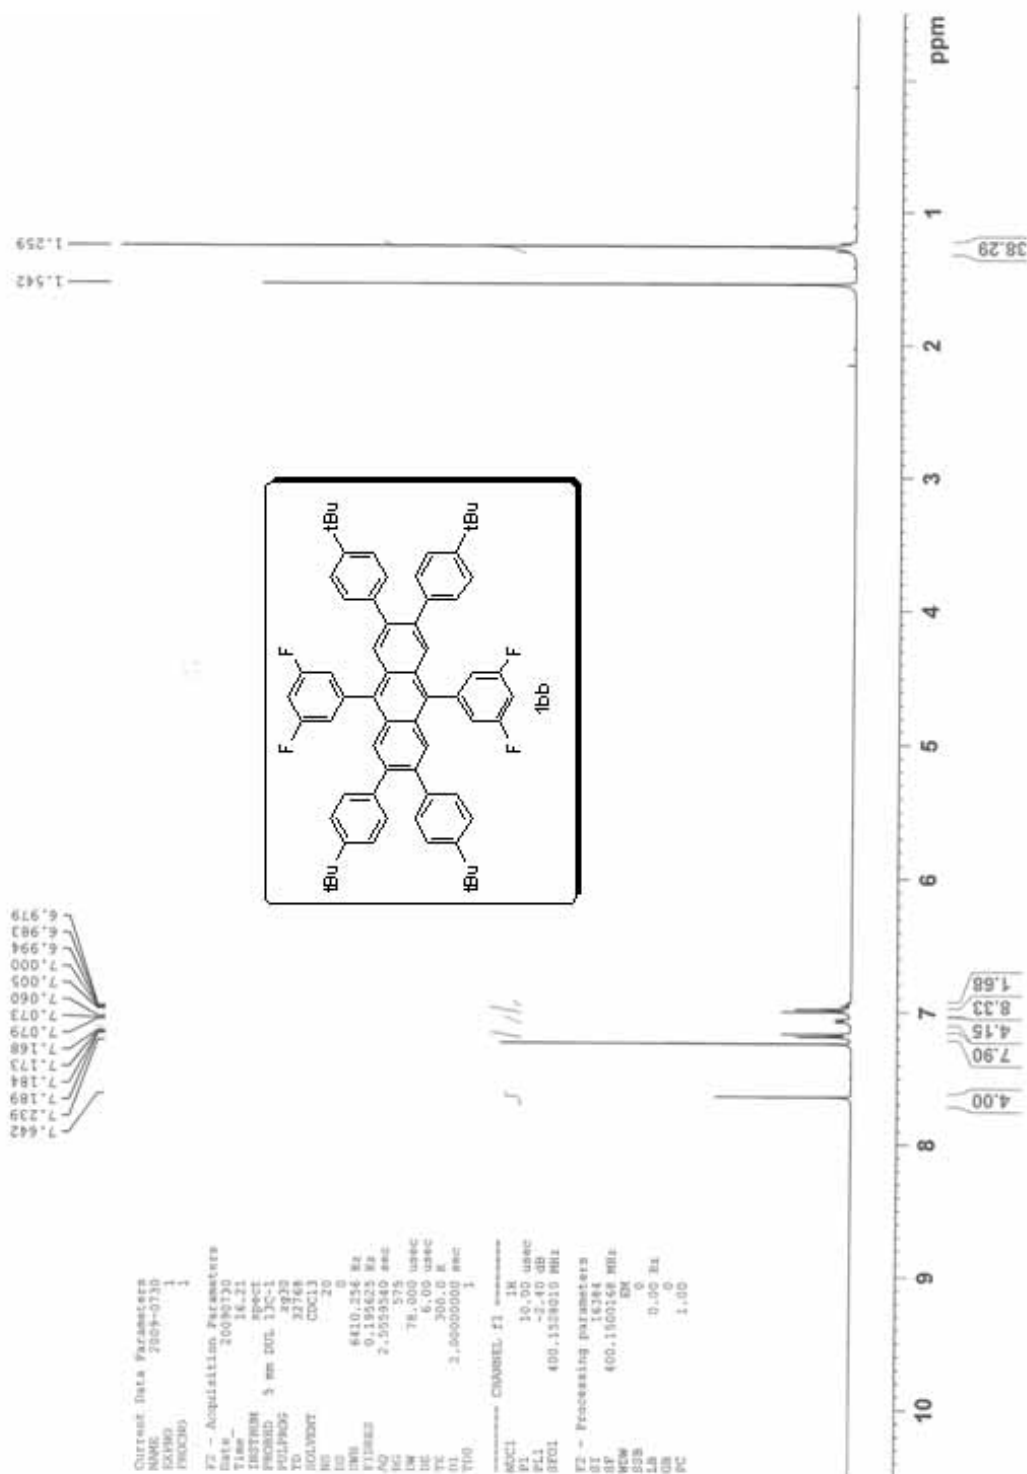

Compound **1bb**

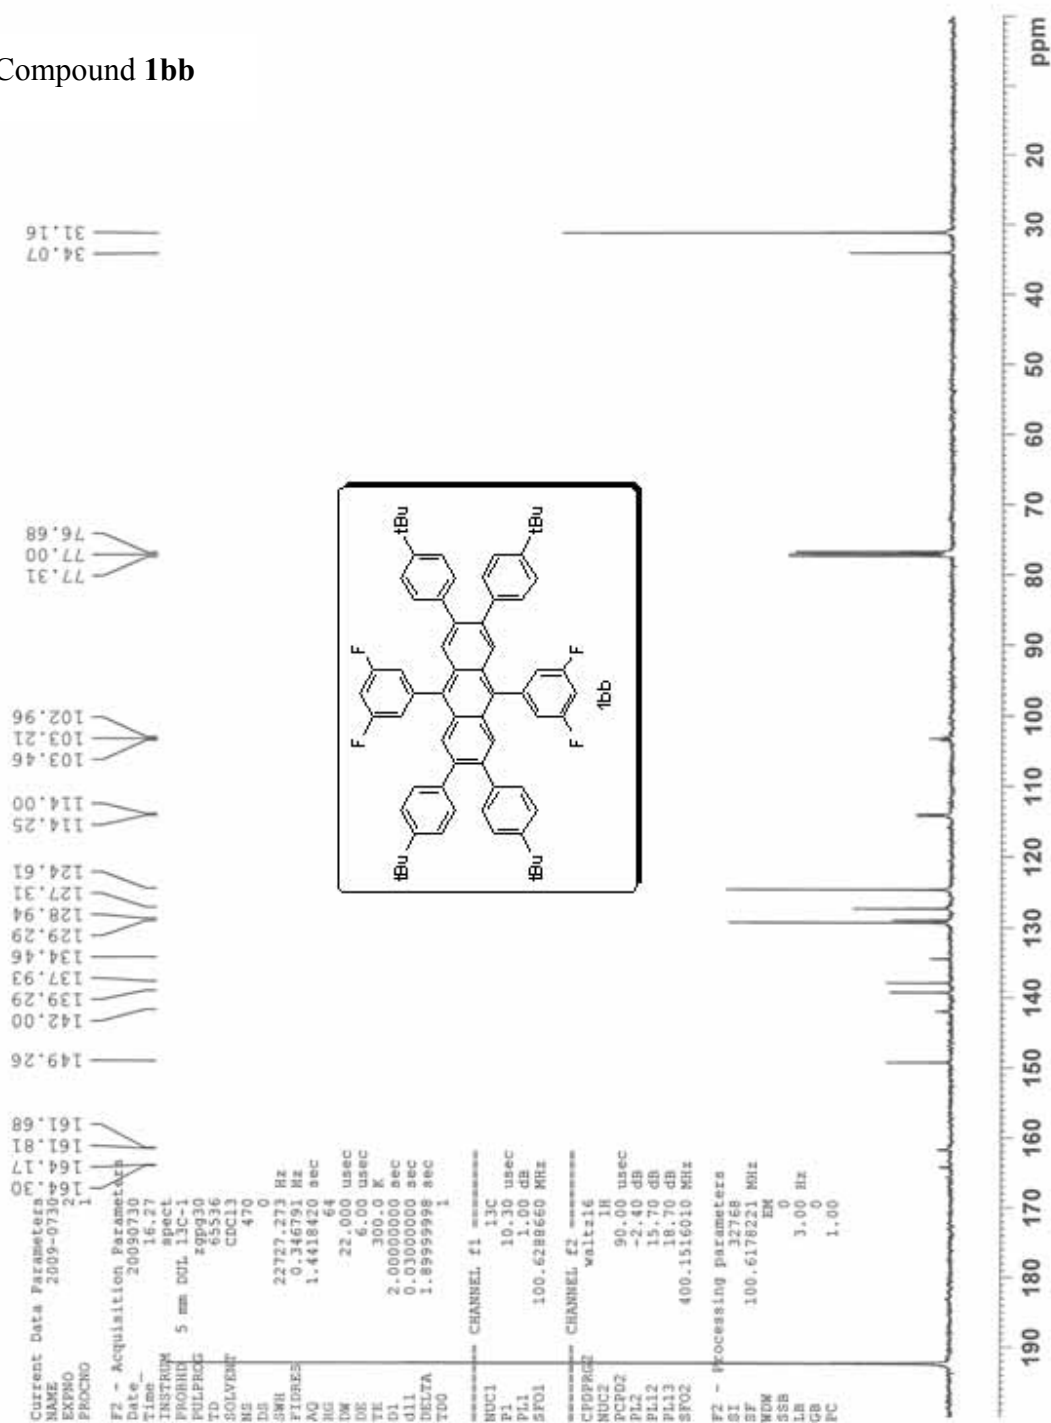



Compound **2bb**

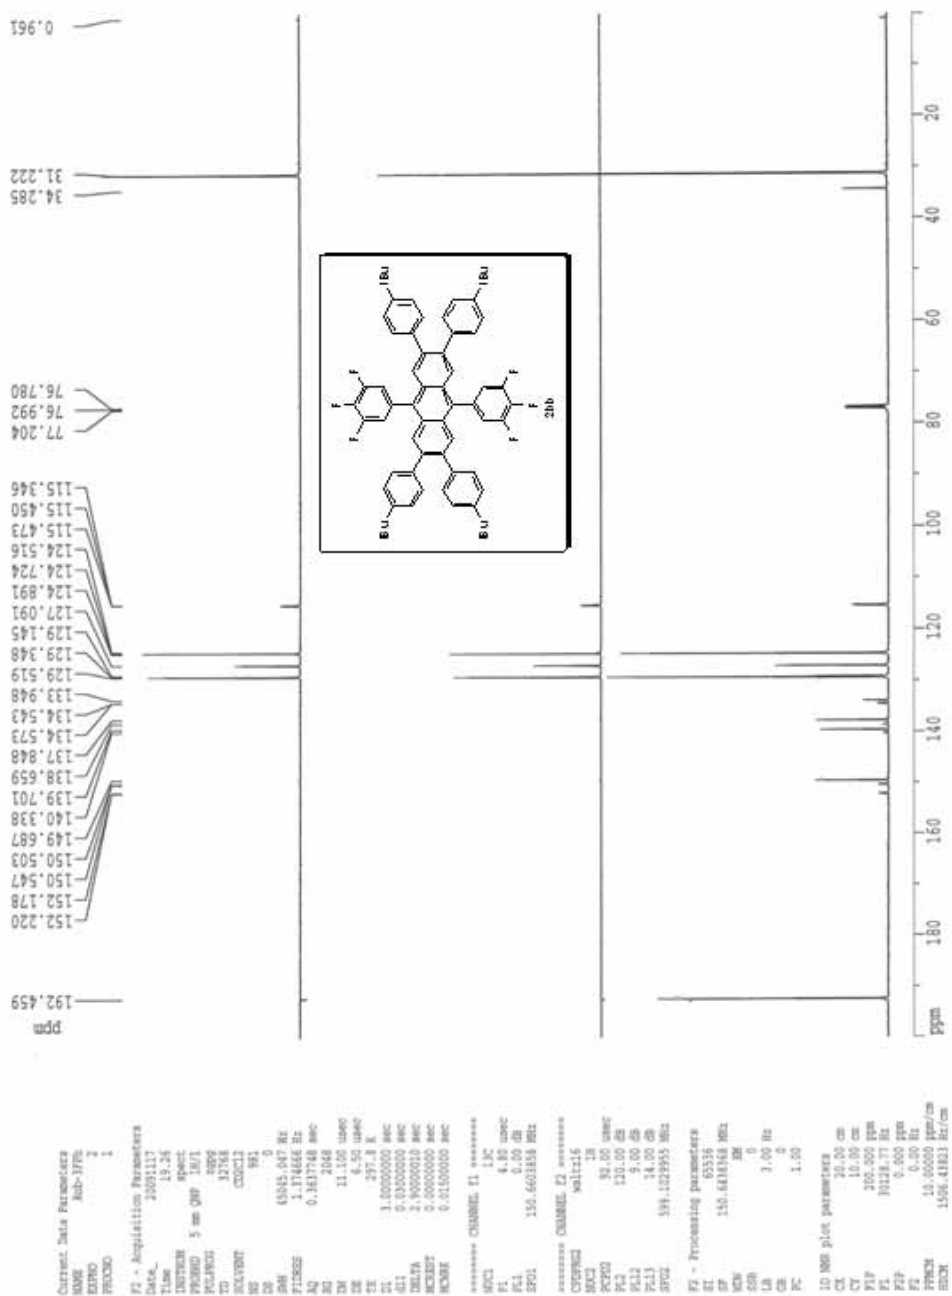

Compound **3bb**

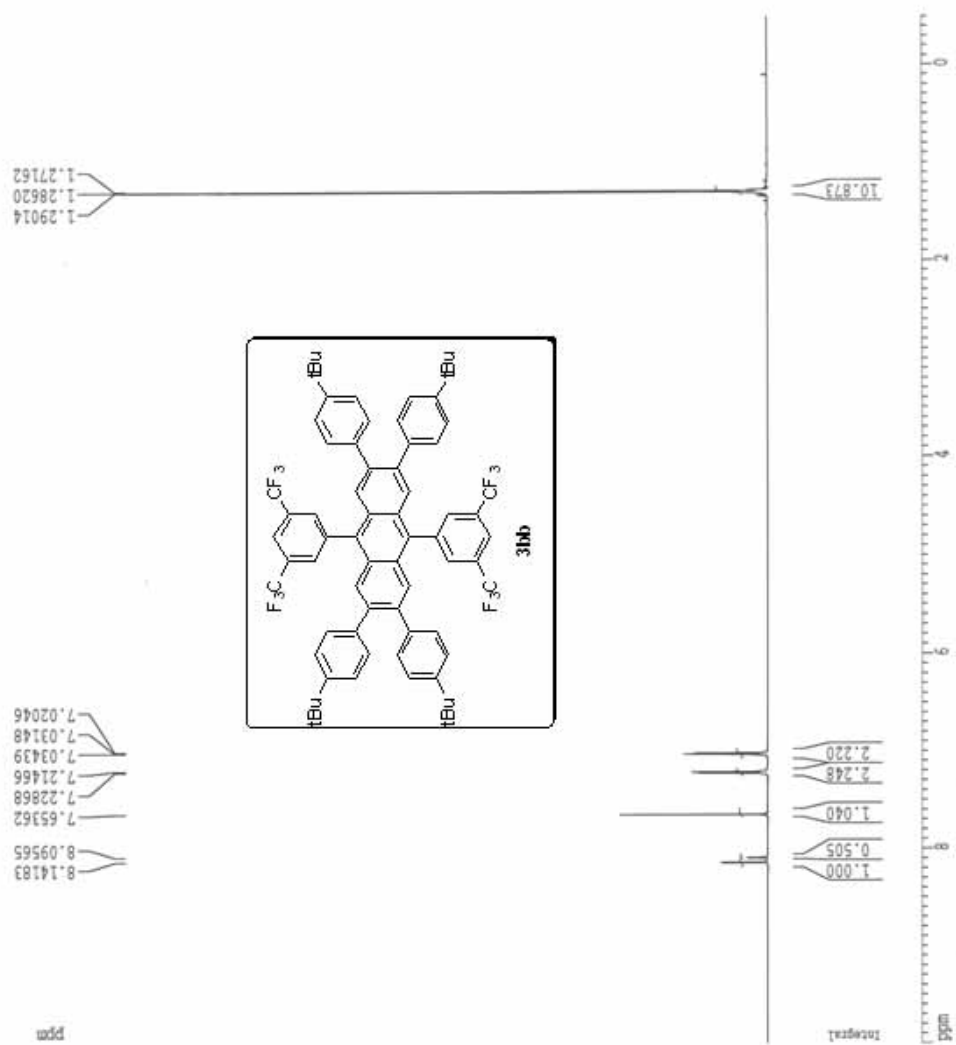

Name: 3bb  
 MW: 408.54  
 SMILES: CC(C)(C)c1ccc(cc1C(F)(F)F)-c2ccc(cc2C(F)(F)F)-c3ccc(cc3C(C)(C)C)-c4ccc(cc4C(C)(C)C)

1H NMR (CDCl<sub>3</sub>)  
 8.1483 (m, 1H)  
 8.09565 (m, 0.5H)  
 7.65362 (m, 1.04H)  
 7.22868 (m, 2.248H)  
 7.2046 (m, 2.220H)  
 1.27162 (m, 10.873H)

Compound **3bb**

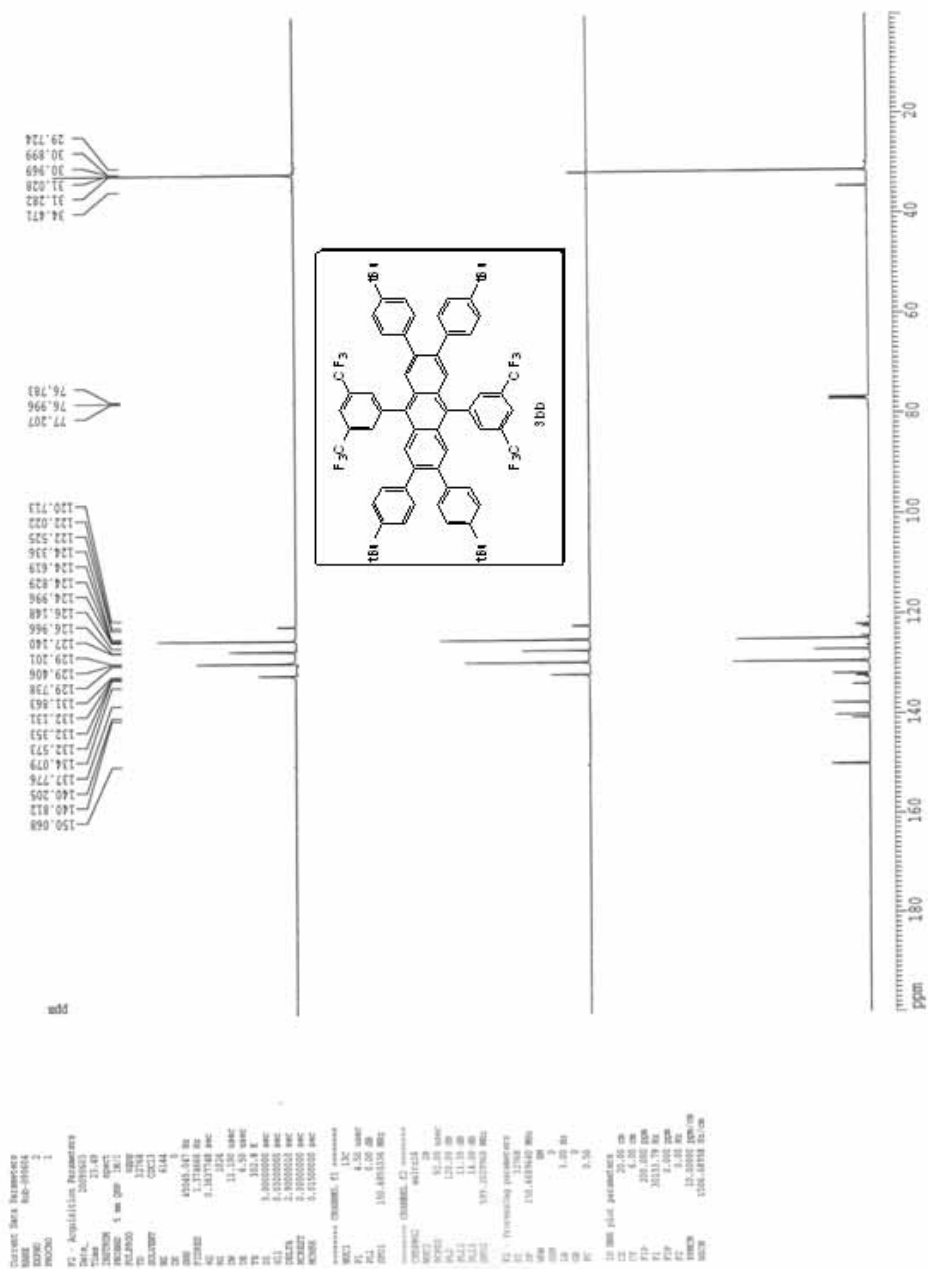

C) DSC curve of **1bb**, **2bb** and **3bb**.

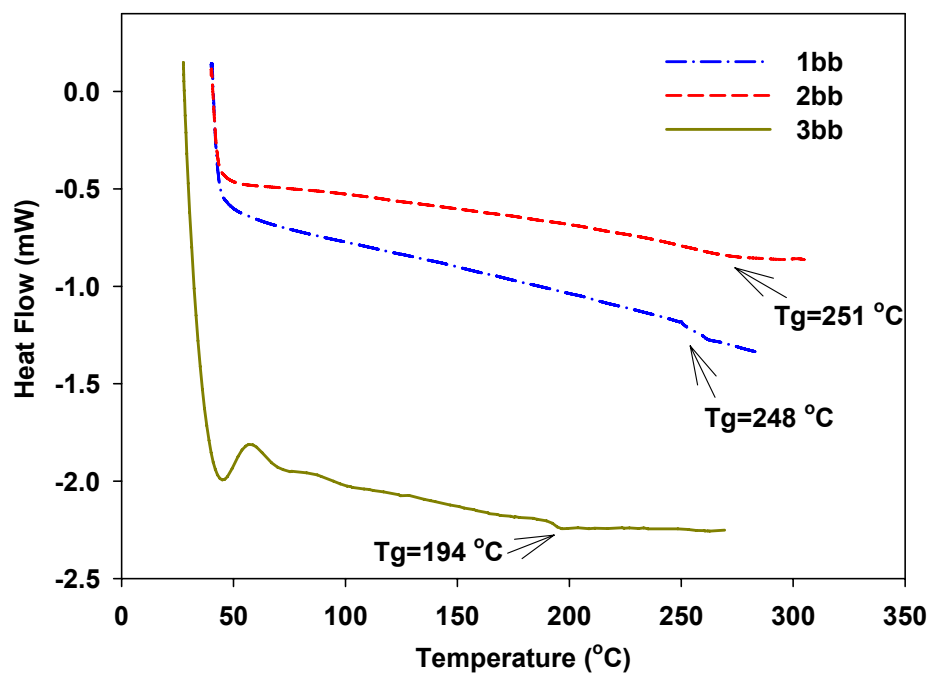



**D)** Figure S1. Absorption spectra of the **HPhAn** dopants in solution and the PL spectrum of DMPPP

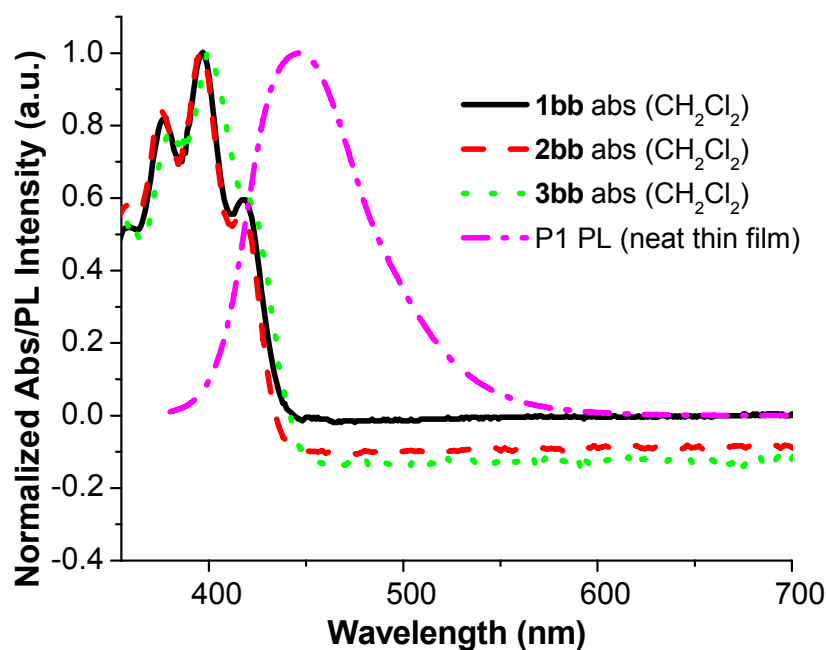

i) As shown in this figure, the structured low energy absorption band and emission band of the **HPhAn** dopants at 350–440 nm and ca. 450 nm overlap well with the emission band of the DMPPP host efficient energy transfer from the DMPPP host to **HPhAn** dopants is expected.

ii) the EL spectra of the **HPhAn**-doped devices shown in Figs. 4 and 8 display a little vibrational structure similar to that observed in the **HPhAn** solution PL spectra (Fig. 2). Such vibrational structure can not be found in the DMPPP PL spectrum.

Based on i) and ii), it is clear that the EL peak of the doped device is originated from the **HPhAn** dopant.
